# AUTHOR INDEX TO VOLUME 75

## A

- Abouleish, Ezzat: Intrathecal Morphine as a Cause for Herpes Simplex Should be Scratched Out, 919
- Abouleish, Ezzat, *see* Rawal, Narinder
- Abrams, Jonathan T., *see* Horrow, Jan C.
- Ackerman, E. W., *see* Korsten, H. H. M.
- Adamantidis, Monique M., *see* Adnet, Pascal J.
- Adnet, Pascal J., Krivosic-Horber, Renée M., Adamantidis, Monique M., Reyford, Hugo, Cordonnier, Corinne, Haudecoeur, Ghislain: Effects of Calcium-free Solution, Calcium Antagonists, and the Calcium Agonist BAY K 8644 on Mechanical Responses of Skeletal Muscle from Patients Susceptible to Malignant Hyperthermia, 413
- Adnot, Serge, *see* Beydon, Laurent
- Agusti, Alvar G. N., *see* Gea, Joaquim
- Akata, Takashi, Yoshitake, Jun-ichi, Nakashima, Mikio, Itoh, Takeo: Effects of Protamine on Vascular Smooth Muscle of Rabbit Mesenteric Artery, 833
- Alberti, K. G. M. M.: Reply, 913
- Albertson, T. E., Tseng, C.-C., Joy, R. M.: Propofol Modification of Evoked Hippocampal Dentate Inhibition in Urethane-anesthetized Rats, 82
- Albrecht, Ronald F., *see* Hoffman, William E.
- Ali, M. A., *see* Block, Robert I.
- Allen, Gregory, *see* MacKenzie, Alex E.
- Allison, Paul M., Whitten, Charles W.: What Is the Mechanism of Action of Aprotinin?, 377
- Andreev, Alexandre, *see* Rouby, Jean-Jacques
- Appleton, F. M., *see* Dodds, T. M.
- Archer, David P., Priddy, Richard E., Tang, Timothy K. K., Sabourin, Mary Anne, Samanani, Naaznin: The Influence of Cryogenic Brain Injury on the Pharmacodynamics of Pentobarbital: Evidence for a Serotonergic Mechanism, 634
- Aronson, Solomon, Lee, Bryan K., Wiencek, Jeff G., Feinstein, Steven B., Roizen, Michael F., Karp, Robert B., Ellis, John E.: Assessment of Myocardial Perfusion during CABG Surgery with Two-dimensional Transesophageal Contrast Echocardiography, 433
- Arthaud, Martine, *see* Rouby, Jean-Jacques
- Arthur, G. R., *see* Santos, A. C.
- Artru, Alan A., *see* Marathe, Punit H.
- Asai, Takashi, Fujise, Kumiko, Uchida, Morio: Use of the Laryngeal Mask in a Child with Tracheal Stenosis, 903
- Ashburn, Michael A., *see* Streisand, James B.
- Atkins, Robert F.: Truth in Advertising: The Journal's Responsibility, 547
- Atlee, John L., III, *see* Laszlo, Adam; *also see* Polic, Stojan; Woelck, Harvey J.

- Aukburg, Stanley, *see* Savino, Joseph S.
- Ault, Kenneth, *see* Rinder, Christine S.
- Ault, Kenneth A., *see* Rinder, Christine S.

## B

- Baele, Philippe L., Rennotte, Marie-Thérèse E., Veyckemans, Francis A.: External Compression of the Abdominal Aorta Reversing Tetralogy of Fallot Cyanotic Crisis, 146
- Bailey, James M., Levy, Jerrold H., Rogers, H. Gary, Szlam, Fania, Hug, Carl C., Jr.: Pharmacokinetics of Amrinone during Cardiac Surgery, 961
- Baldo, Brian A., *see* Fisher, Malcolm M.
- Bal, F., *see* Korsten, H. H. M.
- Barash, Paul G., *see* Gordon, Michael A.
- Barker, Steven J., Hyatt, John, Clarke, Christopher, Tremper, Kevin K.: Hyperventilation Reduces Transcutaneous Oxygen Tension and Skin Blood Flow, 619
- Barker, Steven J., *see* Lee, Steven
- Baronia, A. K., Singh, P. K., Dhiman, R. K.: Intractable Pharyngeal Spasm Following Tracheal Extubation in a Patient with Undiagnosed Tetanus, 1111
- Baron, Jean-François, Bertrand, Michèle, Barré, Eric, Godet, Gilles, Mundler, Olivier, Coriat, Pierre, Viars, Pierre: Combined Epidural and General Anesthesia *versus* General Anesthesia for Abdominal Aortic Surgery, 611
- Barré, Eric, *see* Baron, Jean-François
- Bartkowski, Richard R., *see* Epstein, Richard H.
- Barzilai, Benico; *see* Hogue, Charles W., Jr.; *also see* Pulley, Debra D.
- Bashein, G., Syrovoy, George: Burns Associated with Pulse Oximetry during Magnetic Resonance Imaging, 382
- Baysinger, Curtis L., *see* Ducey, Joseph P.
- Beattie, Charles, *see* Frank, Steven M.
- Bennie, Jeffrey B., *see* Gunter, Joel B.
- Benson, Gail V., *see* Wakerlin, George E., Jr.
- Benumof, Jonathan L.: Additional Safety Measures When Changing Endotracheal Tubes, 921
- Benumof, Jonathan L.: Management of the Difficult Adult Airway: With Special Emphasis on Awake Tracheal Intubation, 1087
- Benumof, Jonathan L., *see* Dallen, Larry T.
- Berkowitz, Ivor D., Gervais, Hendrik, Schleien, Charles L., Koehler, Raymond C., Dean, J. Michael, Traystman, Richard J.: Epinephrine Dosage Effects on Cerebral and Myocardial Blood Flow in an Infant Swine Model of Cardiopulmonary Resuscitation, 1041
- Bernard, Jean-Marc, Hommeril, Jean-Luc, Passuti, Norbert, Pinaud, Michel: Postoperative Analgesia by Intravenous Clonidine, 577
- Bernards, Christopher M., Hill, Harlan F.: The Spinal Nerve Root Sleeve Is Not a Preferred Route for Redistribution of Drugs from the Epidural Space to the Spinal Cord, 827
- Bertrand, Michèle, *see* Baron, Jean-François
- Beydon, Laurent, Cinotti, Luc, Rekik, Noureddine, Radermacher, Peter, Adnot, Serge, Meignan, Michel, Harf, Alain, Lemaire, François: Changes in the Distribution of Ventilation and Perfusion Associated with Separation from Mechanical Ventilation in Patients with Obstructive Pulmonary Disease, 730
- Biggio, G., *see* Peduto, V. A.
- Black, Kimberly Ward, *see* Robertie, Paul G.
- Blackshear, Robert H., *see* Gravenstein, Nikolaus
- Blackstock, D., *see* Pounder, D. R.
- Blanck, Thomas J. J., *see* Hoehner, Paul J.
- Block, Robert I., Ghoneim, M. M., Ping, S. T. Sum, Ali, M. A.: Efficacy of Therapeutic Suggestions for Improved Postoperative Recovery Presented during General Anesthesia, 746
- Blouin, Robert T., Conard, Pattilyn F., Gross, Jeffrey B.: Time Course of Ventilatory Depression Following Induction Doses of Propofol and Thiopental, 940
- Boezeman, Eduard H., *see* Kalkman, Cor J.
- Bohnert, John, *see* Rinder, Christine S.
- Boldt, Joachim, Zickmann, Bernfried, Czeke, Almos, Herold, Christoph, Dapper, Friedhelm, Hempelmann, Gunter: Blood Conservation Techniques and Platelet Function in Cardiac Surgery, 426
- Bonan, Jayne, *see* Rinder, Christine S.
- Bonnet, Francis, *see* Rostaing, Sylvie
- Booij, Leo H. D. J., *see* Lerou, Jos G. C.
- Boon, W. F., *see* Korsten, H. H. M.
- Borgeat, Alain, Wilder-Smith, Oliver, Tassonyi, Edomer: Induction Dose of Propofol in Infants and Children, 550
- Borm, George F., *see* Lerou, Jos G. C.
- Bortolussi, Mario E., Hunter, John G., Handal, Arthur G.: Forearm Compartment Syndrome after Diazepam Administration, 159
- Bosnjak, Zeljko J., *see* Laszlo, Adam; *also see* Polic, Stojan; Sprung, Juraj; Stowe, David F.
- Bovill, James G., *see* Kalkman, Cor J.
- Bowdle, T. Andrew, *see* Marathe, Punit H.
- Bowering, John B., *see* Thomson, Ian R.
- Bower, Richard J., *see* Gunter, Joel B.
- Boyd, Gwendolyn, *see* Kelly, James B., Jr.
- Bradley, Edwin L., Jr., *see* Kissin, Igor
- Brajtford, Dan, *see* Swygert, Thomas H.
- Bricard, Henri, *see* Laroche, Dominique
- Brobst-Lane, Eileen: Reply, 1120

Brochard, Laurent, Rua, Fernando, Lorino, Hubert, Lemaire, François, Harf, Alain: Inspiratory Pressure Support Compensates for the Additional Work of Breathing Caused by the Endotracheal Tube, 739  
Brock-Utne, John G., *see* Jaffe, Richard A.  
Brown, Marc R., *see* Swygert, Thomas H.  
Brown, Mary P., *see* Palmisano, Barbara W.  
Brown, Pamela T., *see* Kissin, Igor  
Buffington, Charles W.: No Coronary Dilation: No Coronary Steal, 376  
Buffington, Charles W.: Pressure-Rate Quotient in Patients Undergoing Coronary Artery Bypass Graft Surgery, 710  
Buffington, Charles W., Coyle, Richard J.: Altered Load Dependence of Postischemic Myocardium, 464  
Busoni, Paolo, Messeri, Andrea: Spinal Anesthesia in Infants: Could a L5-S1 Approach Be Safer?, 168  
Butterworth, John F., IV, Royster, Roger L., Prielipp, Richard C., Zaloga, Gary P.: Reply, 1121  
Butterworth, John F., IV, *see* Robertie, Paul G.

## C

Caillard, B., *see* Merle, Jean-Pierre  
Camu, Frederic, Debucquoy, Filip: Alfentanil Infusion for Postoperative Pain: A Comparison of Epidural and Intravenous Routes, 171  
Caplan, Robert A., *see* Cheney, Frederick W.  
Capuano, Christine M., *see* Pompy, Lesley  
Cardinet, George H., III, *see* Jaffe, Rory S.  
Casella, Eugenie S., *Intraoperative Use of Echocardiography*, edited by Norbert P. deBruijn and Fiona M. Clements, 925  
Cassel, Christine K., *see* Lutner, Rachel E.  
Cave-Bigley, D., *see* Charters, P.  
Charters, P., Cave-Bigley, D., Roysam, Chandrika S.: Should a Laryngeal Mask Be Routinely Used in Patients Undergoing Thyroid Surgery?, 918  
Chatterjee, Papri, *see* Sipes, Susan L.  
Chen, Bessie B., *see* Fehr, David M.  
Cheney, Frederick W., Posner, Karen L., Caplan, Robert A.: Adverse Respiratory Events Infrequently Lead to Malpractice Suits: A Closed Claims Analysis, 932  
Cheng, Eugene Y., *see* Sprung, Juraj  
Chen, Tong-Yen, *see* Fratacci, Marie-Dominique  
Chestnut, David H., *see* Sipes, Susan L.  
Cheung, Albert T., Weiss, Stuart J., Savino, Joseph S.: Protamine-induced Right-to-left Intracardiac Shunting, 904  
Chou, Yuan-Hwa, Wei, Jeng, Lin, Cheng-I: Halothane Inhibits Residual Fast Sodium Channels in Human Atrial Muscle, 716  
Christopherson, Rose, *see* Frank, Steven M.  
Cinotti, Luc, *see* Beydon, Laurent  
Clarke, Christopher, *see* Barker, Steven J.

Clements, Fiona M., *see* DeBruijn, Norbert P.  
Clifford, Philip S., *see* Palmisano, Barbara W.  
Cochran, Richard P., *see* Whitten, Charles W.  
Coderre, Terence J., *see* Katz, Joel  
Cohen, Robert I., *see* Stevens, Donald S.  
Cohen, Shaul, Whalen, Francis: Another Potential Complication of a Pulmonary Artery Catheter Insertion, 714  
Cohen, Sheila E., *see* Loftus, John R.  
Cole, Lisa R., *see* Robertie, Paul G.  
Conard, Pattilyn, *see* Gross, Jeffrey B.  
Conard, Pattilyn F., *see* Blouin, Robert T.  
Concas, A., *see* Peduto, V. A.  
Connell, G. Raymond, *see* Mangar, Devanand  
Connolly, Michael, Warfield, Carol A.: Reply, 914  
Coon, Robert L., *see* Palmisano, Barbara W.  
Cooper, Michael G., Sethna, Navil F.: Epidural Analgesia in Patients with Congenital Lumbosacral Spinal Anomalies, 370  
Cordonnier, Corinne, *see* Adnet, Pascal J.  
Coriat, Pierre, *see* Baron, Jean-François  
Cottrell, James E., *see* Pompy, Lesley  
Covino, B. G., *see* Santos, A. C.  
Coyle, Richard J., *see* Buffington, Charles W.  
Cozian, Antoine, *see* Malinovsky, Jean-Marc  
Crommelin, M. A., *see* Korsten, H. H. M.  
Crone, Lesley-Ann L., Vogel, Wendy: Failed Spinal Anesthesia with the Sprotte Needle, 717  
Crossan, Mary-Lou, *see* MacKenzie, Alex E.  
Crowley, J. Jay, *see* March, Mollyann G.  
Curry, Craig: *Manual of Pain Management*, edited by Carol A. Warfield, 926  
Curry, Craig, Lenox, W. Casey, Spannhake, E. William, Hirshman, Carol Ann: Contractile Responses of Guinea Pig Trachea to Oxybarbiturates and Thiobarbiturates, 679  
Cutarelli, Vincent: Reply, 714  
Cutkomp, Johann, *see* Hindman, Bradley J.  
Czeke, Almos, *see* Boldt, Joachim

## D

Dallen, Larry T., Wine, Rodger, Benumof, Jonathan L.: Spontaneous Ventilation via Transtracheal Large-bore Intravenous Catheters is Possible, 531  
Daly, Robert, Seravalli, Egilde: "Do-not-resuscitate" Orders during Anesthesia and Surgery, 709  
Dapper, Friedhelm, *see* Boldt, Joachim  
Datta, S.: Anesthetic and Obstetric Management of High-risk Pregnancy, 925  
Davis, P. D., *see* Parbrook, G. D.  
Davis, P. J., *see* Motoyama, E. K.  
Deal, Dwight D., *see* Prough, Donald S.  
Dean, J. Michael, *see* Berkowitz, Ivor D.  
DeBruijn, Norbert P., Clements, Fiona M.: *Intraoperative Use of Echocardiography*, 925  
Debucquoy, Filip, *see* Camu, Frederic

Deegan, Robert, He, Huai Bing, Wood, Alastair J. J., Wood, Margaret: Effects of Anesthesia on Norepinephrine Kinetics: Comparison of Propofol and Halothane Anesthesia in Dogs, 481  
Deem, Steven, Shapiro, Harvey M., Marshall, Lawrence F.: Quadraplegia in a Patient with Cervical Spondylosis after Thoracolumbar Surgery in the Prone Position, 527  
Deen, Louis, *see* Kalkman, Cor J.  
Deers, Mark A., *see* Schubert, Armin  
Defalque, Ray J., Wright, A. J.: The First Anesthetic Mixture, 1118  
deKock, Marc: Site of Hemodynamic Effects of  $\alpha_2$ -Adrenergic Agonists, 715  
Dershwitz, Mark, Rosow, Carl E., DiBiase, Patricia M., Zaslavsky, Alan: Reply, 707  
DeWitt, Douglas S., *see* Prough, Donald S.  
Dexter, Franklin, *see* Hindman, Bradley J.  
Dhiman, R. K., *see* Baronia, A. K.  
DiBiase, Patricia M., *see* Dershwitz, Mark  
Dietrich, W., Richter, J. A., Schramm, W., Spannagl, M.: Reply, 378  
Dirksen, Ris, *see* Lerou, Jos G. C.  
Ditto, Frank F., III, *see* Gibbons, James J.  
Doblar, Dennis D., *see* Hitt, Kevin L.  
Dodds, T. M., Haney, M. F., Appleton, F. M.: Management of Peripartum Congestive Heart Failure Using Continuous Arteriovenous Hemofiltration in a Patient with Myotonic Dystrophy, 907  
Dohi, Shuji, *see* Nishikawa, Toshiaki  
Douglas, Pamela S., *see* Lowenstein, Edward  
Drachman, Douglas, Strichartz, Gary: Potassium Channel Blockers Potentiate Impulse Inhibition by Local Anesthetics, 1051  
Drasner, Kenneth, Rigler, Mark L.: Repeat Injection after a "Failed Spinal": At Times, a Potentially Unsafe Practice, 713  
Drasner, Kenneth, *see* Rigler, Mark L.  
Ducey, Joseph P., Fincher, Cecil W., Baysinger, Curtis L.: Therapeutic Suppression of a Permanent Ventricular Pacemaker Using a Peripheral Nerve Stimulator, 533  
Dudas, Louise, *see* Robertie, Paul G.  
Duke, Peter C., *see* Lutner, Rachel E.  
Dunn, Catherine M., *see* Gunter, Joel B.  
Dunn, W. Thomas, Jr., *see* Stevens, Donald S.  
Dutrillaux, F., *see* Merle, Jean-Pierre

## E

Eckerle, Joseph S., *see* Kemmotsu, Osamu  
Eddy, A. Craig, *see* Kharasch, Evan D.  
Efsthathiou, Constantinos, *see* Pulley, Debra D.  
Einarson, D. W., *see* Parlow, Joel L.  
Eisenach, James C.: Mechanism of Antiarrhythmic Effect of Dexmedetomidine on epinephrine-induced arrhythmias, 1116  
Eisenach, James C.: Respiratory Depression Following Intrathecal Opioids, 712  
Elliott, Thomas E., *see* Jaffe, Rory S.  
Ellis, John E., *see* Aronson, Solomon  
Elmore, Jeffrey C., *see* Whitten, Charles W.

- Ennis, Jeffrey Howard: Opioid Analgesics and the Burning Pain of Guillain-Barré Syndrome, 913
- Epstein, Richard H., Bartkowski, Richard R., Huffnagle, Suzanne: Continuous Noninvasive Finger Blood Pressure during Controlled Hypotension: A Comparison with Intraarterial Pressure, 796
- Etches, Richard C., Sandler, Alan N., Lawson, Stephanie L.: A Comparison of the Analgesic and Respiratory Effects of Epidural Nalbuphine or Morphine in Postthoracotomy Patients, 9
- Eurin, Joëlle, *see* Rouby, Jean-Jacques
- Evans, George, *see* Zacher, Allan N.

## F

- Fehr, David M., Nyhan, Daniel P., Chen, Besie B., Murray, Paul A.: Pulmonary Vasoconstriction by Cyclooxygenase Metabolites and Angiotensin II after Hypoperfusion in Conscious, Pentobarbital-anesthetized, and Halothane-anesthetized Dogs, 257
- Feinstein, Steven B., *see* Aronson, Solomon
- Fennessey, Paul V., *see* Morrison, John E., Jr.
- Ferguson, Gary G., *see* Lam, Arthur M.
- Fincher, Cecil W., *see* Ducey, Joseph P.
- Fink, B. Raymond: ASA Award: John F. Nunn, 560
- Finster, M., *see* Santos, A. C.
- Fisher, Dennis M., *see* Spears, Robert S., Jr.
- Fisher, Malcolm M., Baldo, Brian A., Silbert, Brendan S.: Anaphylaxis during Anesthesia: Use of Radioimmunoassays to Determine Etiology and Drugs Responsible in Fatal Cases, 1112
- Fletcher, Jeffrey E., *see* Levitt, Roy C.
- Fletcher, Roger: The Relationship Between the Arterial to End-tidal PCO<sub>2</sub> Difference and Hemoglobin Saturation in Patients with Congenital Heart Disease, 210
- Foldes, Francis F., Nagashima, Hideo, Nguyen, Hung D., Schiller, Wilma S., Mason, Mary M., Ohta, Yoshio: The Neuromuscular Effects of ORG9426 in Patients Receiving Balanced Anesthesia, 191
- Forbes, Robert B., *see* Murray, David J.
- Frais, Michael A., *see* Thomson, Ian R.
- Frank, Steven M., Norris, Edward J., Christopherson, Rose, Beattie, Charles: Right- and Left-arm Blood Pressure Discrepancies in Vascular Surgery Patients, 457
- Fratacci, Marie-Dominique, Frostell, Claes S., Chen, Tong-Yen, Wain, John C., Jr., Robinson, Dwight R., Zapol, Warren M.: Inhaled Nitric Oxide: A Selective Pulmonary Vasodilator of Heparin-Protamine Vasoconstriction in Sheep, 990
- Freyburger, G., *see* Janvier, G.
- Froese, A., *see* Jacka, M.
- Frostell, Claes S., *see* Fratacci, Marie-Dominique
- Fujioka, Hitoshi, *see* Shimoji, Koki
- Fujise, Kumiko, *see* Asai, Takashi
- Fujita, Yoshihisa, Kimura, Ken'ichi, Hamada, Hiroshi, Takaori, Masuhiki: Comparative Effects of Halothane, Isoflurane, and Sevoflurane on the Liver with Hepatic Artery Ligation in the Beagle, 313
- Fujiwara, Naoshi, *see* Shimoji, Koki
- Fukuda, Satoru, *see* Shimoji, Koki
- Funatsu, Naohiko, *see* Hindman, Bradley J.
- Fung, Dennis L., White, David A., Jones, Brian R., Gronert, Gerald A.: The Onset of Disuse-related Potassium Efflux to Succinylcholine, 650
- Furman, Wayne L., *see* Tobias, Joseph D.
- Fusciardi, J., *see* Karayan, J.

## G

- Gaba, David M., Howard, Steven K.: Human Error in Anesthesia, February 26–March 1, 1991, 553
- Gallagher, John D.: The Electrophysiologic Effects of Amiodarone and Halothane on Canine Purkinje Fibers, 106
- Gallagher, John D., McClernan, Candyce A.: The Effects of Halothane on Ventricular Tachycardia in Intact Dogs, 866
- Gandjbakch, Iradj, *see* Rouby, Jean-Jacques
- Gea, Joaquim, Roca, Josep, Torres, Antoni, Agustí, Alvar G. N., Wagner, Peter D., Rodriguez-Roisin, Robert: Mechanisms of Abnormal Gas Exchange in Patients with Pneumonia, 782
- Genton, Randall E., *see* Pulley, Debra D.
- Gervais, Hendrik, *see* Berkowitz, Ivor D.
- Gessa, G. L., *see* Peduto, V. A.
- Ghoneim, M. M., *see* Block, Robert I.
- Gibbons, James J., Ditto, Frank F., III: Sudden Asystole after Spinal Anesthesia Treated with the "Pacing Thump," 705
- Ginsburg, Richard S., Porterfield, Kim, Lippmann, Maurice: Propofol: Bolus Induction plus Continuous Infusion in a Patient with Duchenne Muscular Dystrophy, 376
- Gobuty, A. H., *see* Rawal, Narinder
- Godet, Gilles, *see* Baron, Jean-François
- Goffen, Bernard S.: Proper Needle Size for Performing Cervical Epidural Injections, 166
- Goldman, E., Road, J., Grassino, A.: Recovery of Costal and Crural Diaphragmatic Contractility from Partial Paralysis, 123
- Gordon, Michael A., Urban, Michael K., O'Connor, Teresa, Barash, Paul G.: Reply, 711
- Goto, Ryokichi, *see* Maekawa, Nobuhiro; *also see* Mikawa, Katsuya
- Grassino, A., *see* Goldman, E.
- Gravenstein, Nikolaus, Blackshear, Robert H., Wissler, Richard N.: An Approach to Spinal or Epidural Catheters That Are Difficult to Remove, 544
- Griffin, James D., *see* Whitten, Charles W.
- Gronert, Gerald A., *see* Fung, Dennis L.; *also see* Jaffe, Rory S.

- Gross, Jeffrey B.: *Studying a Study and Testing a Test: How to Read the Medical Literature*, Second Edition, by Richard K. Riegelman and Robert P. Hirsch, 1128
- Gross, Jeffrey B., Weller, Robert S., Conard, Pattiyn: Flumazenil Antagonism of Midazolam-induced Ventilatory Depression, 179
- Gross, Jeffrey B., *see* Blouin, Robert T.
- Grouls, R. J. E., *see* Korsten, H. H. M.
- Grum, Daniel F.: Reply, 1126
- Gunning, Thomas C., *see* Swygert, Thomas H.
- Gunter, Joel B., Dunn, Catherine M., Bennie, Jeffrey B., Pentecost, Diane L., Bower, Richard J., Ternberg, Jessie L.: Optimum Concentration of Bupivacaine for Combined Caudal-General Anesthesia in Children, 57
- Guo, Tian-Zhi, Tinklenberg, Julie, Oliker, Rachel, Maze, Mervyn: Central  $\alpha_1$ -Adrenoceptor Stimulation Functionally Antagonizes the Hypnotic Response to Dexmedetomidine, an  $\alpha_2$ -Adrenoceptor Agonist, 252
- Gustafson, Ingvar, *see* Nellgård, Bengt

## H

- Haberkern, Charles M., *see* Orr, Rosemary J.
- Hackmann, Thomas, Steward, David J., Sheps, Samuel B.: Anemia in Pediatric Day-surgery Patients: Prevalence and Detection, 27
- Haering, J. Michael, *see* Lowenstein, Edward
- Hague, Brian I., *see* Streisand, James B.
- Hall, Steven C., *see* Stevenson, G. W.
- Hamada, Hiroshi, *see* Fujita, Yoshihisa
- Handal, Arthur G., *see* Bortolussi, Mario E.
- Haney, M. F., *see* Dodds, T. M.
- Hannallah, Medhat: The Univent® Tube: Bronchial Cuff Inflation, 165
- Harf, Alain, *see* Beydon, Laurent; *also see* Brochard, Laurent
- Hargardine, Judy, *see* Rawal, Narinder
- Harrington, Jeanette, *see* Hindman, Bradley J.
- Harrison, L. Mark, *see* Morrison, John E., Jr.
- Hartung, John, *see* Pompy, Lesley
- Hastings, Randolph H., McKay, Warren R.: Treatment of Benign Chronic Abdominal Pain with Neurolytic Celiac Plexus Block, 156
- Hatanaka, Tetsuo, Yamashita, Taku: Another Cause of Upper Airway Obstruction, 1117
- Hatori, Tsuruo, *see* Shimoji, Koki
- Haudecoeur, Ghislain, *see* Adnet, Pascal J.
- Hayashi, Yukio, Sumikawa, Koji, Maze, Mervyn: Reply, 1116
- Hayashi, Yukio, Sumikawa, Koji, Maze, Mervyn, Yamatodani, Atsushi, Kamibayashi, Takahiko, Kuro, Masakazu, Yoshiya, Ikuto: Dexmedetomidine Prevents Epinephrine-induced Arrhythmias Through Stimulation of Central  $\alpha_2$  Adrenoceptors in Halothane-anesthetized Dogs, 113
- Hayashi, Yukio, *see* Kamibayashi, Takahiko

Heerdt, Paul M., Triantafyllou, Anastasios: Perioperative Management of Patients Receiving a Lung Transplant, 922  
 He, Huai Bing, *see* Deegan, Robert  
 Hemelrijck, Jan Van, Smith, Ian, White, Paul F.: Use of Desflurane for Outpatient Anesthesia: A Comparison with Propofol and Nitrous Oxide, 197  
 Hempelmann, Gunter, *see* Boldt, Joachim  
 Hennes, Hans Jürgen, *see* Jantzen, Jan-Peter A. H.  
 Herold, Christoph, *see* Boldt, Joachim  
 Herva, Rita, *see* Rawal, Narinder  
 Hill, Harlan F., *see* Bernards, Christopher M.; *also see* Kharasch, Evan D.  
 Hillman, Robert, *see* Rinder, Christine S.  
 Hindman, Bradley J., Funatsu, Naohiko, Harrington, Jeanette, Cutkomp, Johann, Dexter, Franklin, Todd, Michael M., Tinker, John H.: Cerebral Blood Flow Response to  $\text{Paco}_2$  during Hypothermic Cardiopulmonary Bypass in Rabbits, 662  
 Hiraga, Kazuaki, *see* Nishino, Takashi  
 Hirsch, Irl B., White, Paul F.: Reply, 912  
 Hirsch, Robert P., *see* Riegelman, Richard K.  
 Hirshberg, Gary E., *see* Riegle, Elaine V.  
 Hirshman, Carol Ann, *see* Curry, Craig  
 Hitt, Kevin L., Doblar, Dennis D.: The Risk of Tracheal Aspiration of Surgically Produced Foreign Bodies, 915  
 Hoefsloot, F., *see* Korsten, H. H. M.  
 Hoeft, Andreas, Sonntag, Hans, Stephan, Heidrun, Kettler, Dietrich: Validation of Myocardial Oxygen Demand Indices in Patients Awake and during Anesthesia, 49  
 Hoehner, Paul J., Quigg, Mary C., Blanck, Thomas J. J.: Halothane Depresses D600 Binding to Bovine Heart Sarcolemma, 1019  
 Hofer, Roger E., Lanier, William L.: The Effects of Insulin Infusion on Plasma and Brain Glucose in Hyperglycemic Diabetic Rats: A Comparison with Placebo-treated Diabetic and Nondiabetic Rats, 673  
 Hoffmann, Raymond G., *see* Palmisano, Barbara W.  
 Hoffman, William E., Kochs, Eberhard, Werner, Christian, Thomas, Chinamma, Albrecht, Ronald F.: Dexmedetomidine Improves Neurologic Outcome from Incomplete Ischemia in the Rat: Reversal by the  $\alpha_2$ -Adrenergic Antagonist Atipamezole, 328  
 Hogan, Quinn H.: Lumbar Epidural Anatomy: A New Look by Cryomicrotome Section, 767  
 Hogue, Charles W., Jr., Platin, Mitchell, Barzilai, Benico, Kaiser, Larry R.: Intraoperative Use of Transesophageal Echocardiography with Pulsed-wave Doppler Evaluation of Ventricular Filling Dynamics during Pericardiotomy, 701  
 Hokari, Tamaki, *see* Shimoji, Koki  
 Holbrook, R. Hal, *see* Loftus, John R.  
 Hommeril, Jean-Luc, *see* Bernard, Jean-Marc

Hool, Geoffrey J.: A Second Sir Humphry Davy?, 705  
 Horrow, Jan C., Abrams, Jonathan T., VanRiper, Daniel F., Lambson, David L., Storella, Robert J.: Ventilatory Compliance after Three Sufentanil-Pancuronium Induction Sequences, 969  
 Horrow, Jan C., Pharo, Gregory: Successful Defibrillation with Near-simultaneous Orthogonal Discharges, 362  
 Hosking, Michael P.: Should Calcium Be Administered Prior to Separation from Cardiopulmonary Bypass?, 1121  
 Howard, Steven K., *see* Gaba, David M.  
 Hudson, Robert J., *see* Thomson, Ian R.  
 Huffnagle, Suzanne, *see* Epstein, Richard H.  
 Hug, Carl C., Jr., *see* Bailey, James M.  
 Hunter, John G., *see* Bortolussi, Mario E.  
 Hutmacher, M., *see* Zbinden, A. M.  
 Hyatt, John, *see* Barker, Steven J.  
 Hynson, James M., *see* Larson, Merlin D.

# I

Ide, Tohru, *see* Isono, Shiroh  
 Inoue, Yoshitaka, *see* Tanigawa, Koichi  
 Ishikawa, Teruhiko, *see* Nishino, Takashi  
 Isono, Shiroh, Ide, Tohru, Kochi, Tetsuo, Mizuguchi, Tadanobu, Nishino, Takashi: Effects of Partial Paralysis on the Swallowing Reflex in Conscious Humans, 980  
 Itoh, Takeo, *see* Akata, Takashi  
 Iwata, Sadayuki, *see* Tanigawa, Koichi

# J

Jacka, M., Froese, A.: Tracheal Extubation in Children, 546  
 Jackson, Kyle, Rauck, Richard L.: Reply, 166  
 Jaffe, Richard A., Pinto, Fausto J., Schnittger, Ingela, Brock-Utne, John G.: Intraoperative Ventilator-induced Right-to-left Intracardiac Shunt, 153  
 Jaffe, Rory S., Martucci, Richard W., Gronert, Gerald A., Elliott, Thomas E., Cardinet, George H., III: Malignant Hyperthermia: Normal Muscle Calcium Uptake and Abnormal Caffeine and Halothane Contractions, 525  
 Jantzen, Jan-Peter A. H., Hennes, Hans Jürgen: Pigtail Oximetry, 707  
 Janvier, G., Winnock, S., Freyburger, G.: Value of the Activated Partial Thromboplastin Time for Preoperative Detection of Coagulation Disorders Not Revealed by a Specific Questionnaire, 920  
 Johns, Roger A.: EDRF/Nitric Oxide: The Endogenous Nitrovasodilator and a New Cellular Messenger, 927  
 Jones, Brian R., *see* Fung, Dennis L.  
 Jordan, Desmond A., Miller, Edward D., Jr.: Subarachnoid Blockade Alters Homeostasis by Modifying Compensatory Splanchnic

Responses to Hemorrhagic Hypotension, 654

Joy, R. M., *see* Albertson, T. E.

# K

Kaiser, Larry R., *see* Hogue, Charles W., Jr.  
 Kalkman, Cor J., Boezeman, Eduard H., Ribberink, Ariëne A., Oosting, Johannes, Deen, Louis, Bovill, James G.: Influence of Changes in Arterial Carbon Dioxide Tension on the Electroencephalogram and Posterior Tibial Nerve Somatosensory Cortical Evoked Potentials during Alfentanil/Nitrous Oxide Anesthesia, 68  
 Kamibayashi, Takahiko, Hayashi, Yukio, Sumikawa, Koji, Yamatodani, Atsushi, Kawabata, Kazunaga, Yoshiya, Ikuto: Enhancement by Propofol of Epinephrine-induced Arrhythmias in Dogs, 1035  
 Kamibayashi, Takahiko, *see* Hayashi, Yukio  
 Kampine, John P., *see* Kenny, Dermot; *also see* Laszlo, Adam; Palmisano, Barbara W.; Polic, Stojan; Poterack, Karl A.; Schmeling, William T.; Stowe, David F.  
 Kanzaria, Rajendra V., *see* Stevens, Donald S.  
 Karayan, J., LaCoste, L., Fusciardi, J.: Postoperative Apnea in a Full-term Infant, 375  
 Karlin, Andrew, *see* Pompy, Lesley  
 Karp, Robert B., *see* Aronson, Solomon  
 Kater, Kathy, *see* Pulley, Debra D.  
 Katz, Joel, Vaccarino, Anthony L., Coderre, Terence J., Melzack, Ronald: Injury Prior to Neurectomy Alters the Pattern of Autotomy in Rats: Behavioral Evidence of Central Neural Plasticity, 876  
 Kawabata, Kazunaga, *see* Kamibayashi, Takahiko  
 Keleremos, Nicholas, *see* Pulley, Debra D.  
 Kelly, James B., Jr., Boyd, Gwendolyn, Plagenhoef, Jeffrey: A New Presentation of Post-Dural Puncture Complication, 548  
 Kemmotsu, Osamu, Ueda, Mitsuo, Otsuka, Hiroshi, Yamamura, Takeyasu, Winter, Dean C., Eckerle, Joseph S.: Arterial Tonometry for Noninvasive, Continuous Blood Pressure Monitoring during Anesthesia, 333  
 Kemmotsu, Osamu, *see* Otsuka, Hiroshi  
 Kendig, Joan J., *see* Savola, Maarit K. T.  
 Kenny, Dermot, Proctor, Lester T., Schmeling, William T., Kampine, John P., Warltier, David C.: Isoflurane Causes Only Minimal Increases in Coronary Blood Flow Independent of Oxygen Demand, 640  
 Kentsch, Michael, Roewer, Norbert, Kunze, Klaus-Peter, Kuck, Karl-Heinz: Intravenous Dantrolene Does Not Exhibit Calcium Channel Blocking Effects on the Cardiac Conduction System in Humans, 583  
 Keon, Thomas P., *see* Litman, Ronald S.  
 Kepner, G. R.: *Studies of Narcosis*, by Charles Ernest Overton, 552  
 Kestin, I. G.: Effects of Midazolam and/or Butorphanol: II, 706

- Kettler, Dietrich, *see* Hoeft, Andreas /  
Kharasch, Evan D., Hill, Harlan F., Eddy, A. Craig: Influence of Dexmedetomidine and Clonidine on Human Liver Microsomal Alfentanil Metabolism, 520  
Kien, Nguyen D., *see* Moore, Peter G.  
Kim, Jae-Seung, *see* Yang, Victor C.  
Kim, Steve, *see* Lutner, Rachel E.  
Kimura, Ken'ichi, *see* Fujita, Yoshihisa  
Kivvassilis, George V., *see* Pulley, Debra D.  
Kissin, Igor, Brown, Pamela T., Bradley, Edwin L., Jr.: Magnitude of Acute Tolerance to Opioids Is Not Related to Their Potency, 813  
Knight, Paul R., *see* Wilde, Dixon W.  
Knill, R. L.: Ethics in Publication and the "Operator.", 545  
Kochi, Tetsuo, *see* Isono, Shiroh  
Kochs, Eberhard, *see* Hoffman, William E.  
Koehler, Raymond C., *see* Berkowitz, Ivor D.  
Kolmer, Herman H. Beneken, *see* Lerou, Jos G. C.  
Komura, Yoshihiro, *see* Otsuka, Hiroshi  
Kopman, Aaron F.: Tactile Evaluation of Train-of-four Count as an Indicator of Reliability of Antagonism of Vecuronium- or Atracurium-induced Neuromuscular Blockade, 588  
Korneluk, Robert, *see* MacKenzie, Alex E.  
Korsten, H. H. M., Ackerman, E. W., Grouls, R. J. E., VanZundert, A. A. J., Boon, W. F., Bal, F., Crommelin, M. A., Ribot, J. G., Hoefstloot, F., Slooff, J. L.: Long-lasting Epidural Sensory Blockade by n-Butyl-p-Aminobenzoate in the Terminally Ill Intractable Cancer Pain Patient, 950  
Krivosic-Horber, Renée M., *see* Adnet, Pascal J.  
Kuck, Karl-Heinz, *see* Kentsch, Michael  
Kunze, Klaus-Peter, *see* Kentsch, Michael  
Kuro, Masakazu, *see* Hayashi, Yukio  
Kurth, C. D., LeBard, S. E.: Association of Postoperative Apnea, Airway Obstruction, and Hypoxemia in Former Premature Infants, 22
- L**
- LaCoste, L., *see* Karayan, J.  
Lahey, Donelda, *see* MacKenzie, Alex E.  
Laitinen, Jorma O., *see* Salomäki, Timo E.  
Lam, Arthur M., Manninen, Pirjo H., Ferguson, Gary G., Nantau, William: Monitoring Electrophysiologic Function during Carotid Endarterectomy: A Comparison of Somatosensory Evoked Potentials and Conventional Electroencephalogram, 15  
Lambson, David L., *see* Horrow, Jan C.  
Lançon, Jean-Pierre, *see* Merle, Jean-Pierre  
Landault, Catherine, *see* Rouby, Jean-Jacques  
Lanier, William L., *see* Hofer, Roger E.  
Lappas, Demetrios G., *see* Pulley, Debra D.  
Larach, David R., Schuler, H. Gregg: Direct Vasodilation by Sevoflurane, Isoflurane, and Halothane Alters Coronary Flow Reserve in the Isolated Rat Heart, 268  
Laroche, Dominique, Vergnaud, Marie-Claude, Sillard, Béatrice, Soufarapis, Henri, Bricard, Henri: Biochemical Markers of Anaphylactoid Reactions to Drugs: Comparison of Plasma Histamine and Tryptase, 945  
Larson, Merlin D., Sessler, Daniel I., McGuire, Joseph, Hynson, James M.: Isoflurane, but Not Mild Hypothermia, Depresses the Human Pupillary Light Reflex, 62  
Laszlo, Adam, Polic, Stojan, Atlee, John L., III, Kampine, John P., Bosnjak, Zeljko J.: Anesthetics and Automaticity in Latent Pacemaker Fibers: I. Effects of Halothane, Enflurane and Isoflurane on Automaticity and Recovery of Automaticity from Overdrive Suppression in Purkinje Fibers Derived from Canine Hearts, 98  
Laszlo, Adam, Polic, Stojan, Kampine, John P., Turner, Lawrence A., Atlee, John L., III, Bosnjak, Zeljko J.: Halothane, Enflurane, and Isoflurane on Abnormal Automaticity and Triggered Rhythmic Activity of Purkinje Fibers from 24-hour-old Infarcted Canine Hearts, 847  
Laszlo, Adam, *see* Polic, Stojan  
Latson, Terry W., *see* Whitten, Charles W.  
Lawson, Stephanie L., *see* Etches, Richard C.  
LeBard, S. E., *see* Kurth, C. D.  
Lee, Bryan K., *see* Aronson, Solomon  
Lee, Kathryn A., *see* Sessler, Daniel I.  
Lee, Steven, Tremper, Kevin K., Barker, Steven J.: Effects of Anemia on Pulse Oximetry and Continuous Mixed Venous Hemoglobin Saturation Monitoring in Dogs, 118  
Lee, Tai-Shion, Virtusio, Lourdes: Inotropic Effect of Amrinone, 380  
Léger, Philippe, *see* Rouby, Jean-Jacques  
Lehmkuhl, Linda, *see* Rawal, Narinder  
Lemaire, François, *see* Beydon, Laurent; *also see* Brochard, Laurent  
LeMaire, Leon, *see* Streisand, James B.  
Lenox, W. Casey, *see* Curry, Craig  
Lepage, Jean-Yves, *see* Malinovsky, Jean-Marc  
Lerman, Jerrold, *see* Taylor, Robert H.  
Lerou, Jos G. C., Dirksen, Ris, Kolmer, Herman H. Beneken, Booi, Leo H. D. J., Borm, George F.: A System Model for Closed-circuit Inhalation Anesthesia: II. Clinical Validation, 230  
Lerou, Jos G. C., Dirksen, Ris, Kolmer, Herman H. Beneken, Booi, Leo H. D. J.: A System Model for Closed-circuit Inhalation Anesthesia: I. Computer Study, 345  
Levitt, Roy C., Meyers, Deborah, Fletcher, Jeffrey E., Rosenberg, Henry: Molecular Genetics and Malignant Hyperthermia, 1  
Levron, Jean Claude, *see* Rostaing, Sylvie  
Levy, Jerrold H.: Anaphylaxis during Anesthesia, 712  
Levy, Jerrold H., *see* Bailey, James M.  
Licina, Michael G., *see* Schubert, Armin  
Lightstone, Harold: Application of Molecular Genetics to Anesthesiology, 1126  
Lin, Cheng-I, *see* Chou, Yuan-Hwa  
Lindeman, Karen S.: *Anesthetic and Obstetric Management of High-risk Pregnancy*, by S. Datta, 924  
Lineberry, Paul J., *see* Schubert, Armin  
Lippmann, Maurice, *see* Ginsburg, Richard S.  
Litman, Ronald S., Keon, Thomas P.: Postintubation Croup in Children, 1122  
Loftus, John R., Holbrook, R. Hal, Cohen, Sheila E.: Fetal Heart Rate after Epidural Lidocaine and Bupivacaine for Elective Cesarean Section, 406  
Loper, Keith A., *see* Ready, L. Brian  
Lorenz, Robert R., *see* Sayiner, Abdullah  
Lorino, Hubert, *see* Brochard, Laurent  
Lovering, Sandra L., *see* Rawal, Narinder  
Lowenstein, Edward, Haering, J. Michael, Douglas, Pamela S.: Acute Ventricular Wall Motion Heterogeneity: A Valuable but Imperfect Index of Myocardial Ischemia, 385  
Lowenstein, Edward, *see* Park, Kyung W.  
Lutner, Rachel E., Roizen, Michael F., Stocking, Carol B., Thisted, Ronald A., Kim, Steve, Duke, Peter C., Pompei, Peter, Cassel, Christine K.: The Automated Interview versus the Personal Interview: Do Patient Responses to Preoperative Health Questions Differ?, 394  
Luttrupp, Hans-Henrik, Rydgren, Göran, Thomasson, Ronnie, Werner, Olof: A Minimal-flow System for Xenon Anesthesia, 896
- M**
- MacKenzie, Alex E., Allen, Gregory, Lahey, Donelda, Crossan, Mary-Lou, Nolan, Kevin, Mettler, Gabrielle, Worton, Ronald G., MacLennan, David H., Korneluk, Robert: A Comparison of the Caffeine Halothane Muscle Contracture Test with the Molecular Genetic Diagnosis of Malignant Hyperthermia, 4  
MacLennan, David H., *see* MacKenzie, Alex E.  
Maekawa, Nobuhiro, Mikawa, Katsuya, Tanaka, Osamu, Goto, Ryokichi, Obara, Hidefumi: The Laryngeal Mask May Be a Useful Device for Fiberoptic Airway Endoscopy in Pediatric Anesthesia, 169  
Maekawa, Nobuhiro, *see* Mikawa, Katsuya  
Maistre, Geneviève, *see* Rouby, Jean-Jacques  
Malhotra, Vinod, Rosen, Robert J., Slepian, Ralph L.: Life-threatening Hypoxemia after Lithotripsy in an Adult Due to Shock-wave-Induced Pulmonary Contusion, 529  
Malinovsky, Jean-Marc, Cozian, Antoine, Lepage, Jean-Yves, Mussini, Jean-Marie, Pinaud, Michel, Souron, Rémi: Ketamine and Midazolam Neurotoxicity in the Rabbit, 91  
Mangar, Devanand, Connell, G. Raymond: Percutaneous Puncture of the Internal

Jugular Vein Using Continuously Transduced Pressure, 383  
Manninen, Pirjo H., *see* Lam, Arthur M.  
Marathe, Punit H., Shen, Danny D., Artru, Alan A., Bowdle, T. Andrew: Effect of Serum Protein Binding on the Entry of Lidocaine into Brain and Cerebrospinal Fluid in Dogs, 804  
March, Mollyann G., Crowley, J. Jay: An Evaluation of Anesthesiologists' Present Checkout Methods and the Validity of the FDA Checklist, 724  
Marjic, Jure, *see* Stowe, David F.  
Marshall, Lawrence F., *see* Deem, Steven  
Martucci, Richard W., *see* Jaffe, Rory S.  
Mason, Mary M., *see* Foldes, Francis F.  
Mathew, Joseph P., *see* Rinder, Christine S.  
Mathews, Edwin L.: More on Benzocaine and Methemoglobinemia, 715  
Matthews, Dennis, *see* Morrison, John E., Jr.  
Mattila, Severi, *see* Salmenperä, Markku  
Maurer, Walter G.: A Disadvantage of Similar Machine Controls, 167  
Mayumi, Takahisa, *see* Otsuka, Hiroshi  
Maze, Mervyn, *see* Guo, Tian-Zhi; *also see* Hayashi, Yukio; Savola, Maarit K. T.  
McClernan, Candyce A., *see* Gallagher, John D.  
McGuire, Joseph, *see* Larson, Merlin D.; *also see* Sessler, Daniel I.  
McKay, Warren R., *see* Hastings, Randolph H.  
Mehr, Elon H.: *Basic Physics and Measurement in Anaesthesia*, Third Edition, by G. D. Parbrook, P. D. Davis, and E. O. Parbrook, 1128  
Mehta, Mahesh P., *see* Murray, David J.  
Meignan, Michel, *see* Beydon, Laurent  
Melzack, Ronald, *see* Katz, Joel  
Merle, Jean-Pierre, Lançon, Jean-Pierre, Du-trillaux, F., Obadia, Jean-François, Caillard, B.: Effects of Aprotinin in Postoperative Bleeding, 379  
Messori, Andrea, *see* Busoni, Paolo  
Mettler, Gabrielle, *see* MacKenzie, Alex E.  
Metz, Samuel: Little Risk of Hyperosmolar Coma Following Hyperglycemia during Cardiopulmonary Bypass, 912  
Meyers, Deborah, *see* Levitt, Roy C.  
Michenfelder, John D., Milde, James H.: The Relationship among Canine Brain Temperature, Metabolism, and Function during Hypothermia, 130  
Mikawa, Katsuya, Maekawa, Nobuhiro, Goto, Ryokichi, Yaku, Hideaki, Obara, Hidefumi: Transparent Dressing Is Useful for the Secure Fixation of the Endotracheal Tube, 1123  
Mikawa, Katsuya, *see* Maekawa, Nobuhiro  
Milde, James H., *see* Michenfelder, John D.  
Miller, Edward D., Jr., *see* Jordan, Desmond A.  
Miller, Ronald D., *see* Smith, Graham  
Mitchell, Jane, *see* Rinder, Christine S.  
Mizuguchi, Tadanobu, *see* Isono, Shiroh

Moayeri, Azita, *see* Sessler, Daniel I.  
Monroe, Sean M., *see* Stowe, David F.  
Montgomery, C. J., Ready, L. B.: Epidural Opioid Analgesia Does Not Obscure Diagnosis of Compartment Syndrome Resulting from Prolonged Lithotomy Position, 541  
Moore, Peter G., Kien, Nguyen D., Reitan, John A., White, David A., Safwat, Amira M.: No Evidence for Blood Flow Redistribution with Isoflurane or Halothane during Acute Coronary Artery Occlusion in Fentanyl-anesthetized Dogs, 854  
Morgan, M., *see* Smith, Graham  
Morishima, H. O., *see* Santos, A. C.  
Morrison, John E., Jr., Matthews, Dennis, Washington, Reginald, Fennessey, Paul V., Harrison, L. Mark: Phenol Motor Point Blocks in Children: Plasma Concentrations and Cardiac Dysrhythmias, 359  
Motoyama, E. K., Davis, P. J.: Smith's Anesthesia for Infants and Children, 1129  
Mukaida, Keiko, *see* Otsuka, Hiroshi  
Mundler, Olivier, *see* Baron, Jean-François  
Murray, David J., Mehta, Mahesh P., Forbes, Robert B.: The Additive Contribution of Nitrous Oxide to Isoflurane MAC in Infants and Children, 186  
Murray, Paul A., *see* Fehr, David M.  
Mussini, Jean-Marie, *see* Malinovsky, Jean-Marc

# N

Nagashima, Hideo, *see* Foldes, Francis F.  
Nahas, Gabriel G.: Treatment of Cocaine-induced Cardiovascular Toxicity, 544  
Nakashima, Mikio, *see* Akata, Takashi  
Nantau, William, *see* Lam, Arthur M.  
Nellgård, Bengt, Gustafson, Ingvar, Wieloch, Tadeusz: Lack of Protection by the N-Methyl-D-aspartate Receptor Blocker Dizocilpine (MK-801) after Transient Severe Cerebral Ischemia in the Rat, 279  
Nessly, Michael, *see* Ready, L. Brian  
Nguyen, Hung D., *see* Foldes, Francis F.  
Nishikawa, Toshiaki, Dohi, Shuji: Oral Clonidine Blunts the Heart Rate Response to Intravenous Atropine in Humans, 217  
Nishino, Takashi, Tanaka, Atsuko, Ishikawa, Teruhiko, Hiraga, Kazuaki: Respiratory, Laryngeal, and Tracheal Responses to Nasal Insufflation of Volatile Anesthetics in Anesthetized Humans, 441  
Nishino, Takashi, *see* Isono, Shiroh  
Nolan, Kevin, *see* MacKenzie, Alex E.  
Norris, Edward J., *see* Frank, Steven M.  
Nuutinen, Lauri, *see* Rawal, Narinder  
Nuutinen, Lauri S., *see* Salomäki, Timo E.  
Nyhan, Daniel P., *see* Fehr, David M.

# O

Obadia, Jean-François, *see* Merle, Jean-Pierre  
Obara, Hidefumi, *see* Maekawa, Nobuhiro; *also see* Mikawa, Katsuya

O'Connor, Teresa, *see* Gordon, Michael A.  
Ohta, Yoshio, *see* Foldes, Francis F.  
Oliker, Rachel, *see* Guo, Tian-Zhi  
Onodera, Mayumi, *see* Shimoji, Koki  
Oosting, Johannes, *see* Kalkman, Cor J.  
Orr, Rosemary J., Haberkern, Charles M.: Reply, 169  
Otsuka, Hiroshi, Komura, Yoshihiro, Mayumi, Takahisa, Yamamura, Takeyasu, Kemmotsu, Osamu, Mukaida, Keiko: Malignant Hyperthermia during Sevoflurane Anesthesia in a Child with Central Core Disease, 699  
Otsuka, Hiroshi, *see* Kemmotsu, Osamu  
Overton, Charles Ernest: Studies of Narcosis, 552

# P

Palmieri, John, *see* Stevenson, G. W.  
Palmisano, Barbara W., Clifford, Philip S., Hoffmann, Raymond G., Seagard, Jeanne L., Coon, Robert L., Kampine, John P.: Depression of Baroreflex Control of Heart Rate by Halothane in Growing Piglets, 512  
Palmisano, Barbara W., Setlock, Mary A., Brown, Mary P., Siker, Daniel, Tripuraneni, Ravikumar: Dose-response for Atropine and Heart Rate in Infants and Children Anesthetized with Halothane and Nitrous Oxide, 238  
Parbrook, E. O., *see* Parbrook, G. D.  
Parbrook, G. D., Davis, P. D., Parbrook, E. O.: *Basic Physics and Measurement in Anesthesia*, 1128  
Park, Kyung W., Lowenstein, Edward: Acute Complete Heart Block during Anesthesia in a Patient with Severe Coronary Artery Disease: Effect of Scopolamine *versus* Ischemia of the AV Node, 367  
Parlow, Joel L., Einarson, D. W.: An Unusual Cause of Delayed Postmyelogram Headache, 145  
Partridge, B. L.: The Effects of Local Anesthetics and Epinephrine on Rat Sciatic Nerve Blood Flow, 243  
Passuti, Norbert, *see* Bernard, Jean-Marc  
Paulsen, A. William, *see* Swygert, Thomas H.  
Pearl, Ronald G., *see* Wakerlin, George E., Jr.  
Pedersen, H., *see* Santos, A. C.  
Peduto, V. A., Concas, A., Santoro, G., Biggio, G., Gessa, G. L.: Biochemical and Electrophysiologic Evidence That Propofol Enhances GABAergic Transmission in the Rat Brain, 1000  
Pennant, John H., Wallace, Donald: Intrathecal Morphine and Reactivation of Oral Herpes Simplex, 167  
Pennant, John H., Wallace, Donald H.: Reply, 920  
Pentecost, Diane L., *see* Gunter, Joel B.  
Pere, Pertti, *see* Tuominen, Marjatta K.  
Petersen, Guy A.: Does Systematic Anticoagulation Increase the Risk of Internal Jugular Vein Cannulation?, 1124

Pharo, Gregory, *see* Horrow, Jan C.  
 Pinaud, Michel, *see* Bernard, Jean-Marc; *also see* Malinovsky, Jean-Marc  
 Ping, S. T. Sum, *see* Block, Robert I.  
 Pinto, Fausto J., *see* Jaffe, Richard A.  
 Plagenhoef, Jeffrey, *see* Kelly, James B., Jr.  
 Platin, Mitchell, *see* Hogue, Charles W., Jr.  
 Pluskwa, Frédéric, *see* Rostaing, Sylvie  
 Polic, Stojan, Atlee, John L., III, Laszlo, Adam, Kampine, John P., Bosnjak, Zeljko J.: Anesthetics and Automaticity in Latent Pacemaker Fibers: II. Effects of Halothane and Epinephrine or Norepinephrine on Automaticity of Dominant and Subsidiary Atrial Pacemakers in the Canine Heart, 298  
 Polic, Stojan, Atlee, John L., III, Laszlo, Adam, Kampine, John P., Bosnjak, Zeljko J.: Anesthetics and Automaticity in Latent Pacemaker Fibers: III. Effects of Halothane and Ouabain on Automaticity of the SA Node and Subsidiary Atrial Pacemakers in the Canine Heart, 305  
 Polic, Stojan, *see* Laszlo, Adam  
 Pompei, Peter, *see* Lutner, Rachel E.  
 Pompy, Lesley, Karlin, Andrew, Capuano, Christine M., Cottrell, James E., Hartung, John: Paraben Preservatives Do Not Increase Intracranial Pressure in Cats, 669  
 Porterfield, Kim, *see* Ginsburg, Richard S.  
 Port, Friedrich K., *see* Yang, Victor C.  
 Posner, Karen L., *see* Cheney, Frederick W.  
 Poterack, Karl A., Kampine, John P., Schmeling, William T.: The Effect of Halothane on Thermosensitive Neurons in the Preoptic Region of the Anterior Hypothalamus in Acutely Instrumented Cats, 625  
 Pounder, D. R., Blackstock, D., Steward, D. J.: Reply, 546  
 Priddy, Richard E., *see* Archer, David P.  
 Prielipp, Richard C., *see* Butterworth, John F., IV; *also see* Robertie, Paul G.  
 Proctor, Lester T., *see* Kenny, Dermot  
 Prough, Donald S., Whitley, John M., Taylor, Carol L., Deal, Dwight D., DeWitt, Douglas S.: Regional Cerebral Blood Flow Following Resuscitation from Hemorrhagic Shock with Hypertonic Saline: Influence of a Subdural Mass, 319  
 Pulley, Debra D., Kirvassilis, George V., Kelermenos, Nicholas, Kater, Kathy, Barzilai, Benico, Genton, Randall E., Efstathiou, Constantinos, Lappas, Demetrios G.: Regional and Global Myocardial Circulatory and Metabolic Effects of Isoflurane and Halothane in Patients with Steal-prone Coronary Anatomy, 756

## Q

Quigg, Mary C., *see* Hoehner, Paul J.  
 Quinn, John F.: Air Entrainment during Cardiopulmonary Bypass Surgery, 1120

## R

Radermacher, Peter, *see* Beydon, Laurent  
 Raj, P. Prithvi, *see* Rawal, Narinder  
 Ramsay, James G., *see* Shanewise, Jack S.  
 Ramsay, Michael A. E., *see* Swygert, Thomas H.  
 Rasi, Vesa, *see* Salmenperä, Markku  
 Rauck, Richard L., *see* Jackson, Kyle  
 Rawal, Narinder, Nuutinen, Lauri, Raj, P. Prithvi, Lovering, Sandra L., Gobuty, A. H., Hargardine, Judy, Lehmkuhl, Linda, Herva, Rita, Abouleish, Ezzat: Behavioral and Histopathologic Effects Following Intrathecal Administration of Butorphanol, Sufentanil, and Nalbuphine in Sheep, 1025  
 Ready, L. B., *see* Montgomery, C. J.  
 Ready, L. Brian, Loper, Keith A., Nessly, Michael, Wild, Lorie: Postoperative Epidural Morphine Is Safe on Surgical Wards, 452  
 Rehder, Kai, *see* Sayiner, Abdullah  
 Reichek, Nathaniel, *see* Savino, Joseph S.  
 Reitan, John A., *see* Moore, Peter G.  
 Rekik, Nouredine, *see* Beydon, Laurent  
 Rennotte, Marie-Thérèse E., *see* Baele, Philippe L.  
 Reyford, Hugo, *see* Adnet, Pascal J.  
 Ribberink, Ariëne A., *see* Kalkman, Cor J.  
 Ribot, J. G., *see* Korsten, H. H. M.  
 Richter, J. A., *see* Dietrich, W.  
 Riegelman, Richard K., Hirsch, Robert P.: Studying a Study and Testing a Test: How to Read the Medical Literature, 1128  
 Riegle, Elaine V., Hirshberg, Gary E., Ternberg, Jessie L.: A Cause for Hemodynamic Instability during Hepatic Tumor Resection, 381  
 Rigler, Mark L., Drasner, Kenneth: Distribution of Catheter-injected Local Anesthetic in a Model of the Subarachnoid Space, 684  
 Rigler, Mark L., *see* Drasner, Kenneth  
 Rinder, Christine S., Bohnert, John, Rinder, Henry M., Mitchell, Jane, Ault, Kenneth, Hillman, Robert: Platelet Activation and Aggregation during Cardiopulmonary Bypass, 388  
 Rinder, Christine S., Mathew, Joseph P., Rinder, Henry M., Bonan, Jayne, Ault, Kenneth A., Smith, Brian R.: Modulation of Platelet Surface Adhesion Receptors during Cardiopulmonary Bypass, 563  
 Rinder, Henry M., *see* Rinder, Christine S.  
 Road, J., *see* Goldman, E.  
 Robertie, Paul G., Butterworth, John F., IV, Royster, Roger L., Prielipp, Richard C., Dudas, Louise, Black, Kimberly Ward, Cole, Lisa R., Zaloga, Gary P.: Normal Parathyroid Hormone Responses to Hypocalcemia during Cardiopulmonary Bypass, 43  
 Roberts, L. Clayton, *see* Swygert, Thomas H.  
 Robinson, Dwight R., *see* Fratacci, Marie-Dominique

Roca, Josep, *see* Gea, Joaquim  
 Rodarte, Joseph R., *see* Sprung, Juraj  
 Rodriguez-Roisin, Robert, *see* Gea, Joaquim  
 Roerig, David L., *see* Schmeling, William T.  
 Roewer, Norbert, *see* Kentsch, Michael  
 Rogers, H. Gary, *see* Bailey, James M.  
 Roizen, Michael F., *see* Aronson, Solomon; *also see* Lutner, Rachel E.  
 Rosenberg, Henry, *see* Levitt, Roy C.  
 Rosenberg, Per H., *see* Tuominen, Marjatta K.  
 Rosenbloom, Morley, *see* Thomson, Ian R.  
 Rosen, David A., Rosen, Kathleen R.: A Palatable Gelatin Vehicle for Midazolam and Ketamine, 914  
 Rosen, Kathleen R., *see* Rosen, David A.  
 Rosen, Robert J., *see* Malhotra, Vinod  
 Rosow, Carl E., *see* Dershwitz, Mark  
 Rostaing, Sylvie, Bonnet, Francis, Levron, Jean Claude, Vodinh, Jocelyne, Pluskwa, Frédéric, Saada, Michel: Effect of Epidural Clonidine on Analgesia and Pharmacokinetics of Epidural Fentanyl in Postoperative Patients, 420  
 Rouby, Jean-Jacques, Andreev, Alexandre, Léger, Philippe, Arthaud, Martine, Landault, Catherine, Vicaut, Eric, Maistre, Geneviève, Eurin, Joëlle, Gandjbakch, Iradj, Viars, Pierre: Peripheral Vascular Effects of Thiopental and Propofol in Humans with Artificial Hearts, 32  
 Roy, Raymond C.: Hypoxia among the Experts, 915  
 Roysam, Chandrika S., *see* Charters, P.  
 Royster, Roger L., *see* Butterworth, John F., IV; *also see* Robertie, Paul G.  
 Rua, Fernando, *see* Brochard, Laurent  
 Rubinstein, Eduardo H., *see* Sessler, Daniel I.  
 Rusy, Ben F., *see* Woehlck, Harvey J.  
 Rydgren, Göran, *see* Luttropp, Hans-Henrik

## S

Saada, Michel, *see* Rostaing, Sylvie  
 Sabourin, Mary Anne, *see* Archer, David P.  
 Safwat, Amira M., *see* Moore, Peter G.  
 Saidman, Lawrence J.: Reply, 705  
 Saidman, Lawrence J., *see* Smith, Graham  
 Salmenperä, Markku, Rasi, Vesa, Mattila, Severi: Cardiopulmonary Bypass in a Patient with Factor XII Deficiency, 539  
 Salomäki, Timo E., Laitinen, Jorma O., Nuutinen, Lauri S.: A Randomized Double-blind Comparison of Epidural *versus* Intravenous Fentanyl Infusion for Analgesia after Thoracotomy, 790  
 Samanani, Naaznin, *see* Archer, David P.  
 Sandler, Alan N., *see* Etches, Richard C.  
 Santoro, G., *see* Peduto, V. A.  
 Santos, A. C., Arthur, G. R., Pedersen, H., Morishima, H. O., Finster, M., Covino, B. G.: Systemic Toxicity of Ropivacaine during Ovine Pregnancy, 137

- Savino, Joseph S., Troianos, Christopher A., Aukburg, Stanley, Weiss, Richard, Reichel, Nathaniel: Measurement of Pulmonary Blood Flow with Transesophageal Two-dimensional and Doppler Echocardiography, 445
- Savino, Joseph S., *see* Cheung, Albert T.; *also see* Troianos, Christopher A.
- Savola, Maarit K. T., Woodley, Scott J., Maze, Mervyn, Kendig, Joan J.: Isoflurane and an  $\alpha_2$ -Adrenoceptor Agonist Suppress Nociceptive Neurotransmission in Neonatal Rat Spinal Cord, 489
- Sayiner, Abdullah, Lorenz, Robert R., Warner, David O., Rehder, Kai: Bronchodilation by Halothane Is Not Modulated by Airway Epithelium, 75
- Schaer, Heidi M.: Peripheral Nerve Injury and Automatic Blood Pressure Measurement, 381
- Schiller, Wilma S., *see* Foldes, Francis F.
- Schleien, Charles L., *see* Berkowitz, Ivor D.
- Schmeling, William T., Kampine, John P., Roerig, David L., Warltier, David C.: The Effects of the Stereoisomers of the  $\alpha_2$ -Adrenergic Agonist Medetomidine on Systemic and Coronary Hemodynamics in Conscious Dogs, 499
- Schmeling, William T., *see* Kenny, Dermot; *also see* Poterack, Karl A.
- Schnittger, Ingela, *see* Jaffe, Richard A.
- Schramm, W., *see* Dietrich, W.
- Schubert, Armin, Licina, Michael G., Lineberry, Paul J., Deers, Mark A.: The Effect of Intrathecal Morphine on Somatosensory Evoked Potentials in Awake Humans, 401
- Schuler, H. Gregg, *see* Larach, David R.
- Seagard, Jeanne L., *see* Palmisano, Barbara W.
- Seravalli, Egilde, *see* Daly, Robert
- Sessler, Daniel I.: Central Thermoregulatory Inhibition by General Anesthesia, 557
- Sessler, Daniel I., Lee, Kathryn A., McGuire, Joseph: Isoflurane Anesthesia and Circadian Temperature Cycles in Humans, 985
- Sessler, Daniel I., Rubinstein, Eduardo H., Moayeri, Azita: Physiologic Responses to Mild Perianesthetic Hypothermia in Humans, 594
- Sessler, Daniel I., *see* Larson, Merlin D.
- Sethna, Navil F., *see* Cooper, Michael G.
- Setlock, Mary A., *see* Palmisano, Barbara W.
- Shanewise, Jack S., Ramsay, James G.: *Anesthesia*, Third Edition, edited by R. D. Miller, 924
- Shapiro, Harvey M., *see* Deem, Steven
- Shen, Danny D., *see* Marathe, Punit H.
- Sheps, Samuel B., *see* Hackmann, Thomas
- Sheth, Neha, *see* Wilde, Dixon W.
- Shimoji, Koki, Fujioka, Hitoshi, Onodera, Mayumi, Hokari, Tamaki, Fukuda, Satoru, Fujiwara, Naoshi, Hatori, Tsuruo: Observation of Spinal Canal and Cisternae with the Newly Developed Small-diameter Flexible Fiberscopes, 341
- Siker, Daniel, *see* Palmisano, Barbara W.
- Silbert, Brendan S., *see* Fisher, Malcoklm M.
- Sillard, Béatrice, *see* Laroche, Dominique
- Simeon, Rudy M., *see* Watcha, Mehernoor F.
- Singh, P. K., *see* Baronia, A. K.
- Sipes, Susan L., Chestnut, David H., Vincent, Robert D., Jr., Weiner, Carl P., Thompson, Chris S., Chatterjee, Papri: Does Magnesium Sulfate Alter the Maternal Cardiovascular Response to Vasopressor Agents in Gravid Ewes?, 1010
- Slepian, Ralph L., *see* Malhotra, Vinod
- Slooff, J. L., *see* Korsten, H. H. M.
- Smith, Brian R., *see* Rinder, Christine S.
- Smith, Graham, Miller, Ronald D., Saidman, Lawrence J., Morgan, M.: Reply, 545
- Smith, Ian, *see* Hemelrijk, Jan Van
- Sonntag, Hans, *see* Hoeft, Andreas
- Sosis, Mitchel B.: Effects of Midazolam and/or Butorphanol: I, 706
- Soufarapis, Henri, *see* Laroche, Dominique
- Souron, Rémi, *see* Malinovsky, Jean-Marc
- Spannagl, M., *see* Dietrich, W.
- Spannhake, E. William, *see* Curry, Craig
- Spears, Robert S., Jr., Yeh, Alice, Fisher, Dennis M., Zwass, Maurice S.: The "Educated Hand": Can Anesthesiologists Assess Changes in Neonatal Pulmonary Compliance Manually?, 693
- Sprung, Juraj, Cheng, Eugene Y., Bosnjak, Zeljko J.: Hypothermia and Serum Potassium Concentration, 164
- Sprung, Juraj, Rodarte, Joseph R.: More about the Mechanisms of Diaphragm Displacement during Spontaneous Breathing, 916
- Stanley, Theodore H., *see* Streisand, James B.
- Stanski, Donald R., *see* Streisand, James B.
- Stemp, Leo I., Taswell, Carl: Spastic Torticollis during General Anesthesia: Case Report and Review of Receptor Mechanisms, 365
- Stephan, Heidrun, *see* Hoeft, Andreas
- Stevens, Donald S., Cohen, Robert I., Kan-zaria, Rajendra V., Dunn, W. Thomas, Jr.: "Air in the Syringe": Patient-controlled Analgesia Machine Tampering, 697
- Stevens, Julia L., *see* Watcha, Mehernoor F.
- Stevenson, G. W., Hall, Steven C., Palmieri, John: Anesthetic Considerations for Patients with Larsen's Syndrome, 142
- Steward, David J.: The "Not-so-educated Hand" of the Pediatric Anesthesiologist, 555
- Steward, David J., *see* Hackmann, Thomas
- Steward, D. J., *see* Pounder, D. R.
- Stocking, Carol B., *see* Lutner, Rachel E.
- Storella, Robert J., *see* Horrow, Jan C.
- Stowe, David F.: Reply, 380
- Stowe, David F., Monroe, Sean M., Marijic, Jure, Bosnjak, Zeljko J., Kampine, John P.: Comparison of Halothane, Enflurane, and Isoflurane with Nitrous Oxide on Contractility and Oxygen Supply and Demand in Isolated Hearts, 1062
- Streisand, James B., Varvel, John R., Stanski, Donald R., LeMaire, Leon, Ashburn, Michael A., Hague, Brian I., Tarver, Stephen D., Stanley, Theodore H.: Absorption and Bioavailability of Oral Transmucosal Fentanyl Citrate, 223
- Strichartz, Gary, *see* Drachman, Douglas
- Strong, William E.: Reply, 709
- Sumikawa, Koji, *see* Hayashi, Yukio; *also see* Kamibayashi, Takahiko
- Swygert, Thomas H., Roberts, L. Clayton, Valek, Timothy R., Brajtford, Dan, Brown, Marc R., Gunning, Thomas C., Paulsen, A. William, Ramsay, Michael A. E.: Effect of Intraoperative Low-dose Dopamine on Renal Function in Liver Transplant Recipients, 571
- Syrovoy, George, *see* Bashein, G.
- Szlam, Fania, *see* Bailey, James M.

## T

- Takaori, Masuhiki, *see* Fujita, Yoshihisa
- Tanaka, Atsuko, *see* Nishino, Takashi
- Tanaka, Osamu, *see* Maekawa, Nobuhiro
- Tang, Timothy K. K., *see* Archer, David P.
- Tanigawa, Koichi, Inoue, Yoshitaka, Iwata, Sadayuki: Reply, 919
- Tarver, Stephen D., *see* Streisand, James B.
- Tassonyi, Edomer, *see* Borgeat, Alain
- Taswell, Carl, *see* Stemp, Leo I.
- Taylor, Carol L., *see* Prough, Donald S.
- Taylor, Robert H., Lerman, Jerrold: Minimum Alveolar Concentration of Desflurane and Hemodynamic Responses in Neonates, Infants, and Children, 975
- Teng, Ching-Leou C., *see* Yang, Victor C.
- Ternberg, Jessie L., *see* Gunter, Joel B.; *also see* Riegle, Elaine V.
- Thisted, Ronald A., *see* Lutner, Rachel E.
- Thomas, Chinamma, *see* Hoffman, William E.
- Thomasson, Ronnie, *see* Luttrupp, Hans-Henrik
- Thompson, Chris S., *see* Sipes, Susan L.
- Thomson, Ian R., Bowering, John B., Hudson, Robert J., Fraiss, Michael A., Rosenbloom, Morley: A Comparison of Desflurane and Isoflurane in Patients Undergoing Coronary Artery Surgery, 776
- Till, Gerd O., *see* Yang, Victor C.
- Tinker, John H., *see* Hindman, Bradley J.
- Tinklenberg, Julie, *see* Guo, Tian-Zhi
- Tobias, Joseph D., Furman, Wayne L.: Anesthetic Considerations in Patients Receiving Colony-stimulating Factors (G-CSF and GM-CSF), 536
- Todd, Michael M., *see* Hindman, Bradley J.
- Torres, Antoni, *see* Gea, Joaquim
- Traystman, Richard J., *see* Berkowitz, Ivor D.
- Tremper, Kevin K., *see* Barker, Steven J.; *also see* Lee, Steven
- Triantafillou, Anastasios, *see* Heerdt, Paul M.
- Tripuraneni, Ravikumar, *see* Palmisano, Barbara W.



- Troianos, Christopher A., Savino, Joseph S., Weiss, Richard L.: Transesophageal Echocardiographic Diagnosis of Aortic Dissection during Cardiac Surgery, 149  
Troianos, Christopher A., *see* Savino, Joseph S.  
Truog, Robert D.: Reply, 710  
Tseng, C-C., *see* Albertson, T. E.  
Tuominen, Marjatta K., Pere, Pertti, Rosenberg, Per H.: Unintentional Arterial Catheterization and Bupivacaine Toxicity Associated with Continuous Interscalene Brachial Plexus Block, 356  
Turner, Lawrence A., *see* Laszlo, Adam

## U

- Uchida, Morio, *see* Asai, Takashi  
Ueda, Mitsuo, *see* Kemmotsu, Osamu  
Urban, Michael K., *see* Gordon, Michael A.

## V

- Vaccarino, Anthony L., *see* Katz, Joel  
Valek, Timothy R., *see* Swygert, Thomas H.  
VanRiper, Daniel F., *see* Horrow, Jan C.  
VanZundert, A. A. J., *see* Korsten, H. H. M.  
Varvel, John R., *see* Streisand, James B.  
Vergnaud, Marie-Claude, *see* Laroche, Dominique  
Veyckemans, Francis A., *see* Baele, Philippe L.  
Viars, Pierre, *see* Baron, Jean-François; *also see* Rouby, Jean-Jacques  
Vicaut, Eric, *see* Rouby, Jean-Jacques  
Vincent, Robert D., *see* Sipes, Susan L.  
Virtusio, Lourdes, *see* Lee, Tai-Shion  
Vodinh, Jocelyne, *see* Rostaing, Sylvie  
Vogel, Wendy, *see* Crone, Lesley-Ann L.

## W

- Wagner, Peter D., *see* Gea, Joaquim  
Wain, John C., Jr., *see* Fratacci, Marie-Dominique  
Wakefield, Thomas W., *see* Yang, Victor C.  
Wakerlin, George E., Jr., Benson, Gail V., Pearl, Ronald G.: A Thromboxane Analog Increases Pulmonary Capillary Pressure but Not Permeability in the Perfused Rabbit Lung, 475  
Waldman, Steven D.: Epidural Abscess Associated with Epidural Catheterization, 708  
Wallace, Donald, *see* Pennant, John H.  
Wallace, Donald H., *see* Pennant, John H.  
Waltier, David C.: Reply, 377

- Warfield, Carol A.: Manual of Pain Management, 926  
Warfield, Carol A., *see* Connelly, Michael  
Wartier, David C., *see* Kenny, Dermot; *also see* Schmeling, William T.  
Warner, David O., *see* Sayiner, Abdullah  
Washington, Reginald, *see* Morrison, John E., Jr.  
Watcha, Mehernoor F., Simeon, Rudy M., White, Paul F., Stevens, Julia L.: Effect of Propofol on the Incidence of Postoperative Vomiting after Strabismus Surgery in Pediatric Outpatients, 204  
Wei, Jeng, *see* Chou, Yuan-Hwa  
Weiner, Carl P., *see* Sipes, Susan L.  
Weiss, Richard, *see* Savino, Joseph S.  
Weiss, Richard L., *see* Troianos, Christopher A.  
Weiss, Stuart J., *see* Cheung, Albert T.  
Weller, Robert S., *see* Gross, Jeffrey B.  
Werner, Christian, *see* Hoffman, William E.  
Werner, Olof, *see* Luttrupp, Hans-Henrik  
Westrin, Per: Reply, 550  
Whalen, Francis, *see* Cohen, Shaul  
White, David A., *see* Fung, Dennis L.; *also see* Moore, Peter G.  
White, Paul F., *see* Hemelrijck, Jan Van; *also see* Hirsch, Irl B.; Watcha, Mehernoor F.  
Whitley, John M., *see* Prough, Donald S.  
Whitten, Charles W., Latson, Terry W., Cochran, Richard P., Elmore, Jeffrey C., Griffin, James D.: ST-segment Elevation during Cardiac Electrophysiologic Surgery, 161  
Whitten, Charles W., *see* Allison, Paul M.  
Wieloch, Tadeusz, *see* Nellgård, Bengt  
Wiencek, Jeff G., *see* Aronson, Solomon  
Wilde, Dixon W., Knight, Paul R., Sheth, Neha, Williams, Bruce A.: Halothane Alters Control of Intracellular  $Ca^{2+}$  Mobilization in Single Rat Ventricular Myocytes, 1075  
Wilder-Smith, Oliver, *see* Borgeat, Alain  
Wild, Lorie, *see* Ready, L. Brian  
Williams, Bruce A., *see* Wilde, Dixon W.  
Wilton, Niall C. T.: Aids for Fiberoptically Guided Intubation in Children, 549  
Wine, Rodger, *see* Dallen, Larry T.  
Wingard, Daniel F.: Glycopyrrolate and the Central Anticholinergic Syndrome, 1125  
Winnock, S., *see* Janvier, G.  
Winter, Dean C., *see* Kemmotsu, Osamu  
Wissler, Richard N., *see* Gravenstein, Nikolaus  
Woelck, Harvey J., Rusy, Ben F., Atlee, John L., III: Comparison of Logdose and Bracket Protocols for Determination of Epinephrine

- Arrhythmia Thresholds in Dogs Anesthetized with Thiopental-Halothane, 884  
Wood, Alastair J. J., *see* Deegan, Robert  
Woodley, Scott J., *see* Savola, Maarit K. T.  
Wood, Margaret: Plasma Binding and Limitation of Drug Access to Site of Action, 721  
Wood, Margaret, *see* Deegan, Robert  
Worton, Ronald G., *see* MacKenzie, Alex E.  
Wright, A. J., *see* Defalque, Ray J.

## Y

- Yaksh, Tony L., *see* Yamamoto, Tatsuo  
Yaku, Hideaki, *see* Mikawa, Katsuya  
Yamamoto, Tatsuo, Yaksh, Tony L.: Spinal Pharmacology of Thermal Hyperesthesia Induced by Incomplete Ligation of Sciatic Nerve: I. Opioid and Nonopioid Receptors, 817  
Yamamura, Takeyasu, *see* Kemmotsu, Osamu; *also see* Otsuka, Hiroshi  
Yamashita, Taku, *see* Hatanaka, Tetsuo  
Yamatodani, Atsushi, *see* Hayashi, Yukio; *also see* Kamibayashi, Takahiko  
Yang, Victor C., Port, Friedrich K., Kim, Jae-Seung, Teng, Ching-Leou C., Till, Gerd O., Wakefield, Thomas W.: The Use of Immobilized Protamine in Removing Heparin and Preventing Protamine-induced Complications during Extracorporeal Blood Circulation, 288  
Yaster, Myron: *Smith's Anesthesia for Infants and Children*, Fifth Edition, edited by Etsuro K. Motoyama and Peter J. Davis, 1129  
Yeh, Alice, *see* Spears, Robert S., Jr.  
Yoshitake, Jun-ichi, *see* Akata, Takashi  
Yoshiya, Ikuto, *see* Hayashi, Yukio; *also see* Kamibayashi, Takahiko

## Z

- Zacher, Allan N., Zornow, Mark H., Evans, George: Drug Contamination from Opening Glass Ampules, 893  
Zaloga, Gary P., *see* Butterworth, John F., IV; *also see* Robertie, Paul G.  
Zapol, Warren M.: Reply, 547  
Zapol, Warren M., *see* Fratacci, Marie-Dominique  
Zaslavsky, Alan, *see* Dershwitz, Mark  
Zbinden, A. M., Huttmacher, M.: More on Standardized Alarms, 1125  
Zickmann, Bernfried, *see* Boldt, Joachim  
Zornow, Mark H., *see* Zacher, Allan N.  
Zwass, Maurice S., *see* Spears, Robert S., Jr.
